# Supplementary material for: Involvement of hepcidin in iron metabolism dysregulation in Gaucher disease
Source: PubMed Central journal article supplement — Haematologica. 2018 Jan 5;103(4):587–96. doi: 10.3324/haematol.2017.177816 (PMC5865418; doi:10.3324/haematol.2017.177816), 2018-04
Supplement: 2017_177816-Disclosures_and_Contributions.pdf [file 2017_177816-Disclosures_and_Contributions.pdf]

Haematologica  
HAEMATOL/2017/177816  
Version 3

Involvement of hepcidin in iron metabolism dysregulation in Gaucher disease

Thibaud Lefebvre, Niloofar Reihani, Raed Daher, Thierry Billette de Villemeur, Nadia Belmatoug, Christian Rose, Yves Colin-Aronovicz, Hervé Puy, Caroline Le Van Kim, Mélanie Franco, and Zoubida Karim

Disclosures: No potential conflict of interest relevant to this article was reported.

Contributions: Study concept and design: C.LVK., M.F., and Z.K.; acquisition of patient data: T.L., N.R., and M.F.; patient management: N.B., T.BV., and C.R.; analysis and interpretation of patient data: H.P., T.L., and Z.K.; conducting experiments or material support: T.L., R.D., N.R., and Z.K.; study supervision: Z.K.; critical revision of the manuscript for important intellectual content: Z.K., H.P., C.LVK., M.F., and Y.C.; drafting of the manuscript: T.L. and Z.K.; all authors participated in data discussion, read and approved the manuscript.
